# Supplementary material for: Gemcitabine induces Parkin-independent mitophagy through mitochondrial-resident E3 ligase MUL1-mediated stabilization of PINK1
Source: PubMed Central journal article supplement (PMC6992789; doi:10.1038/s41598-020-58315-w), 2020-01-30
Supplement: 41598_2020_58315_MOESM1_ESM.pdf [file 41598_2020_58315_MOESM1_ESM.pdf]

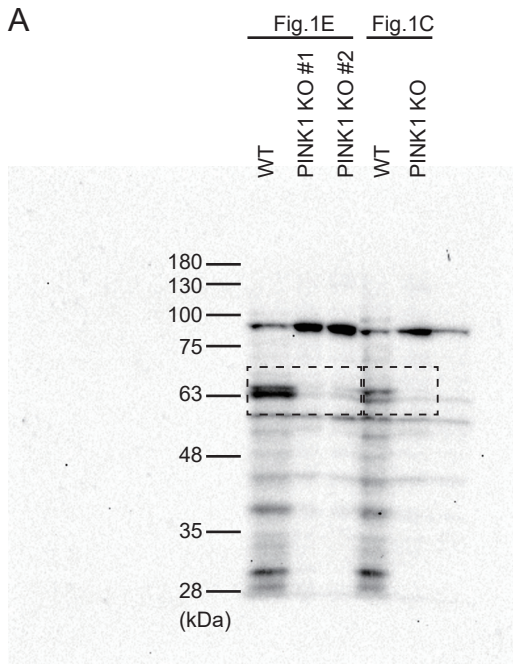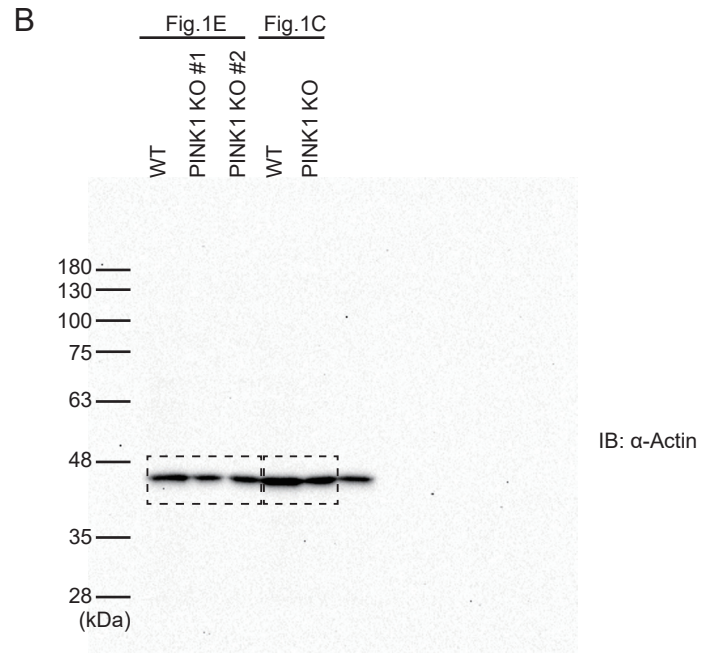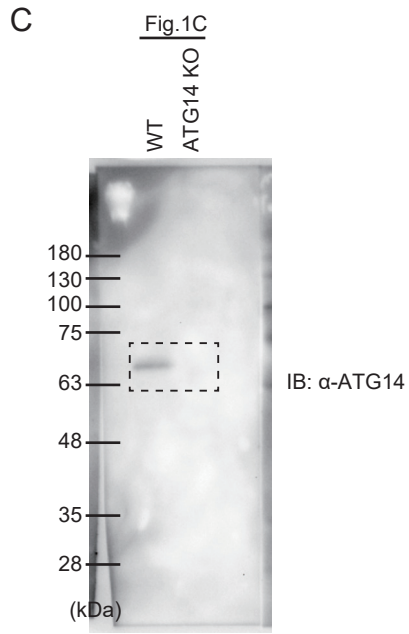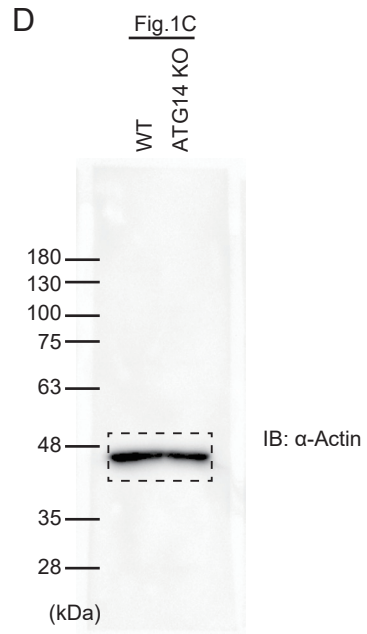

Figure S1

E

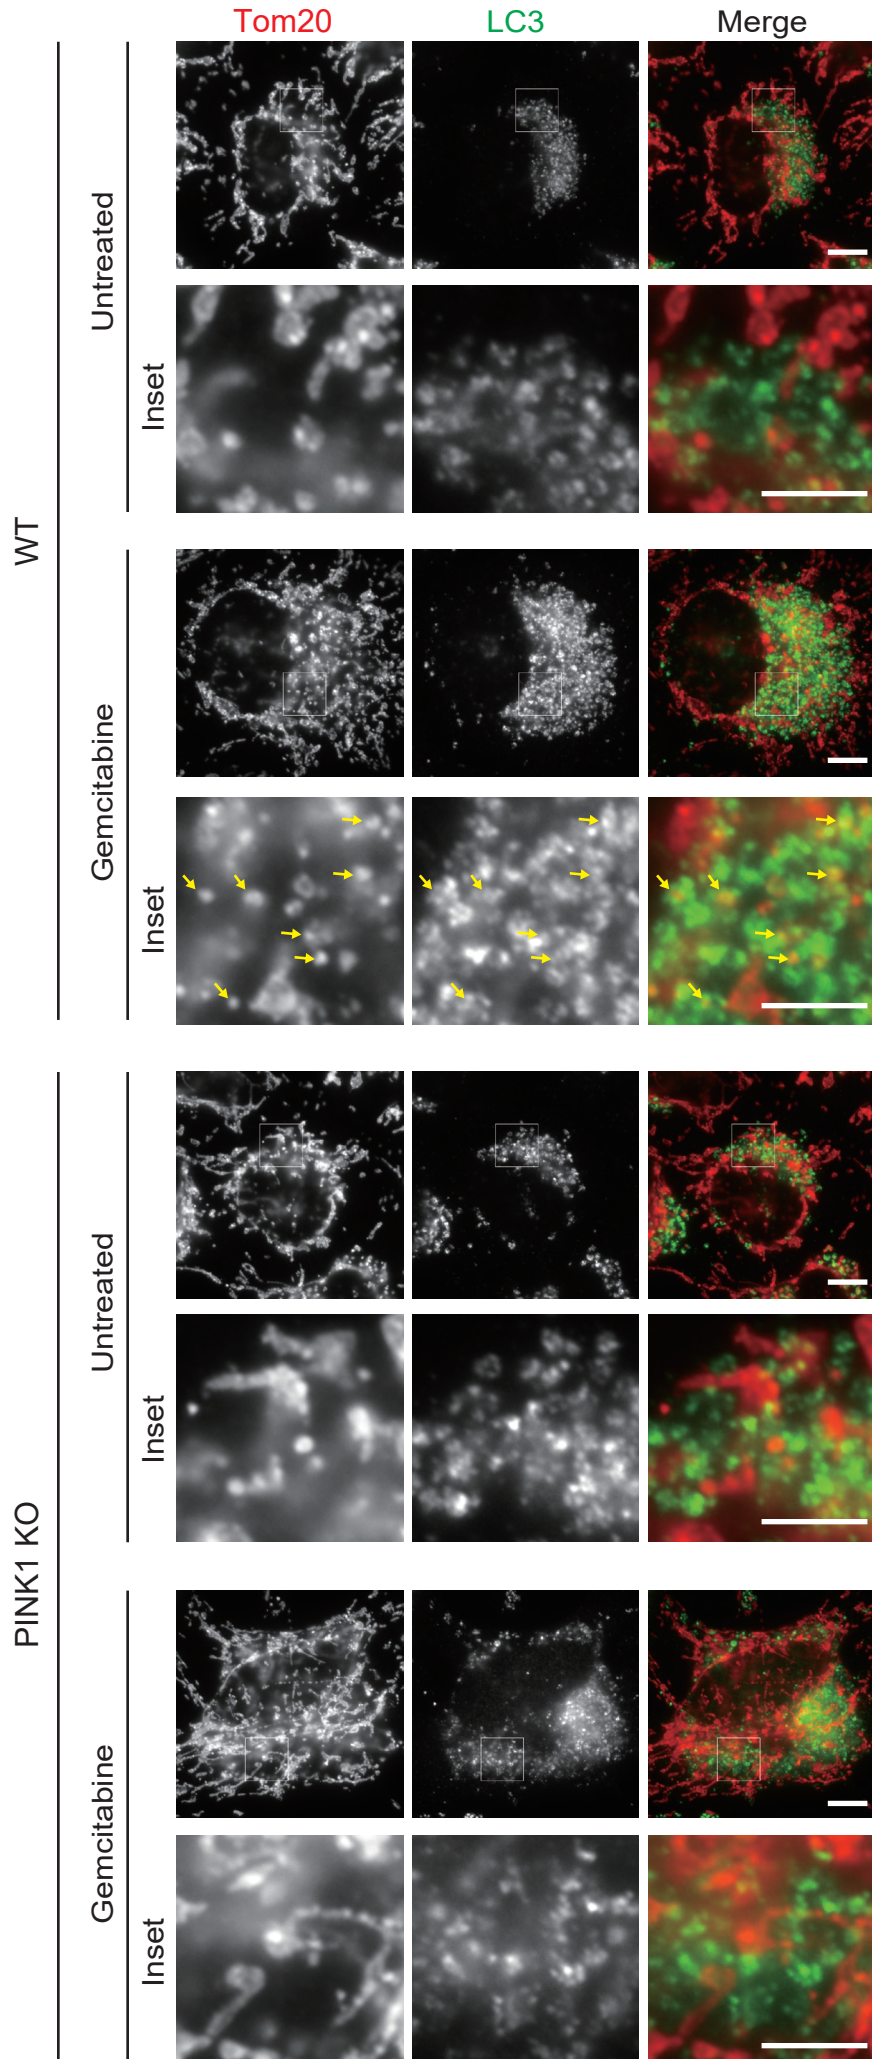

Figure S1 (continued)

F

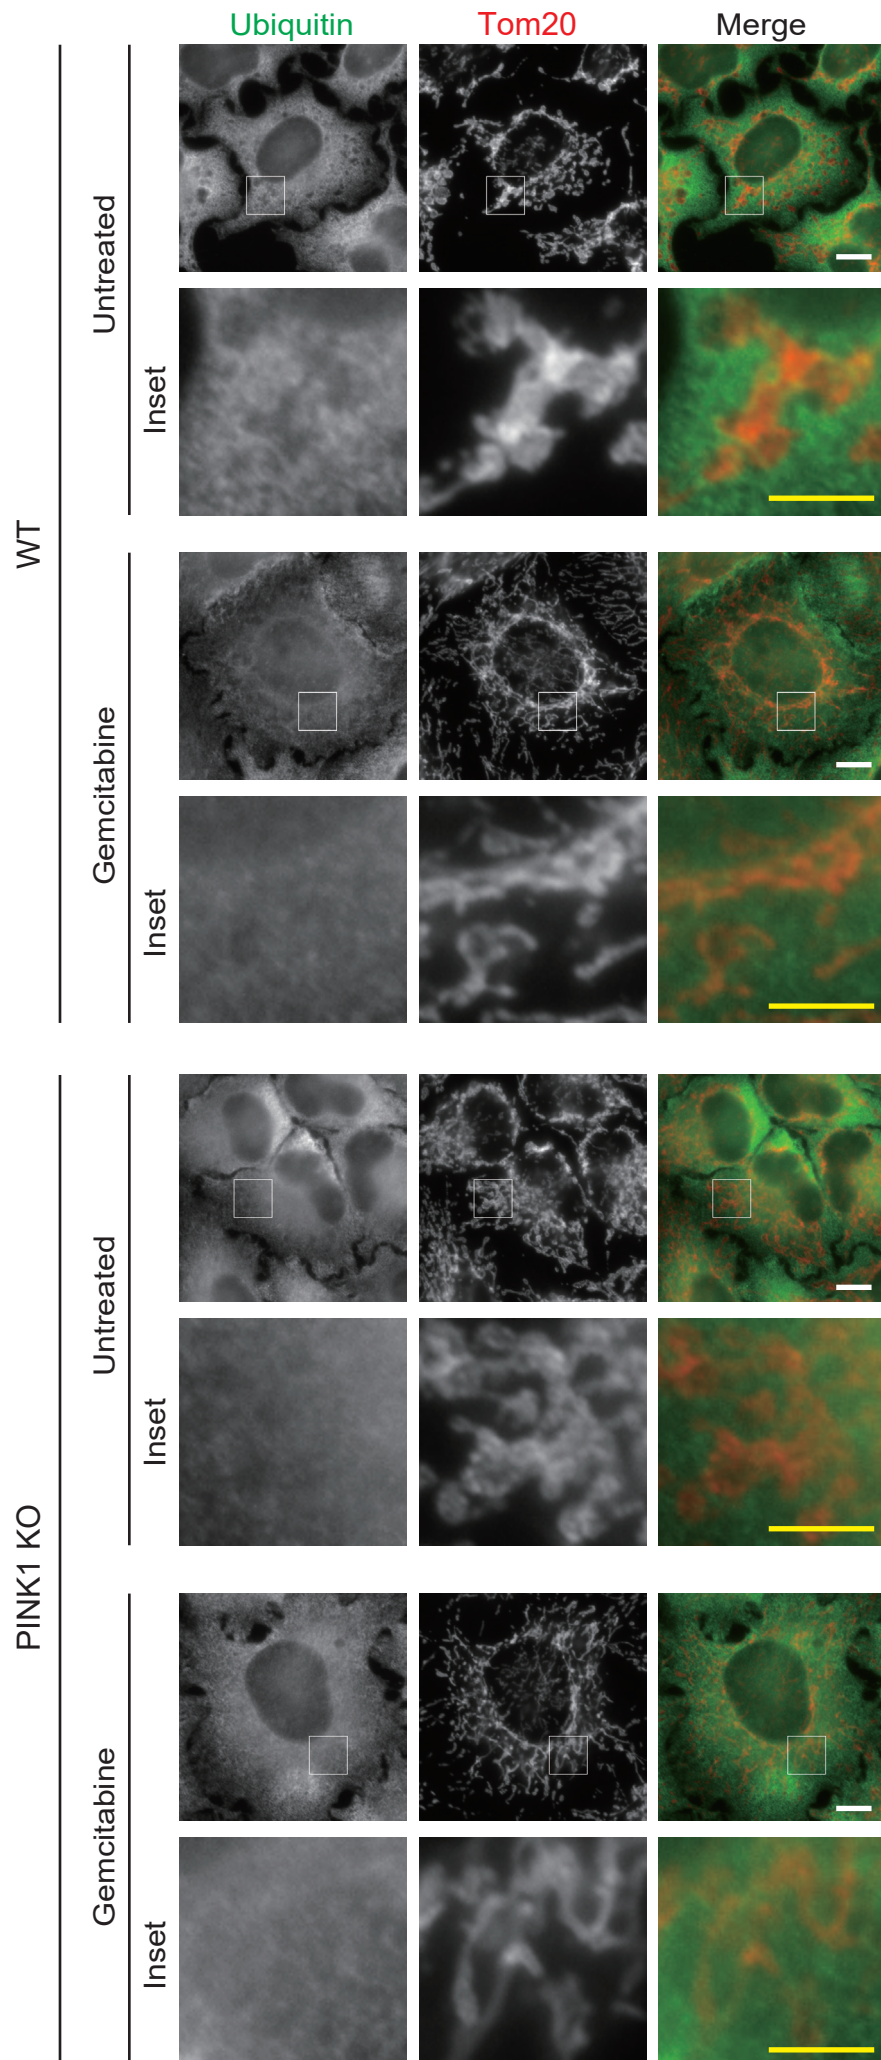

Figure S1 (continued)

G

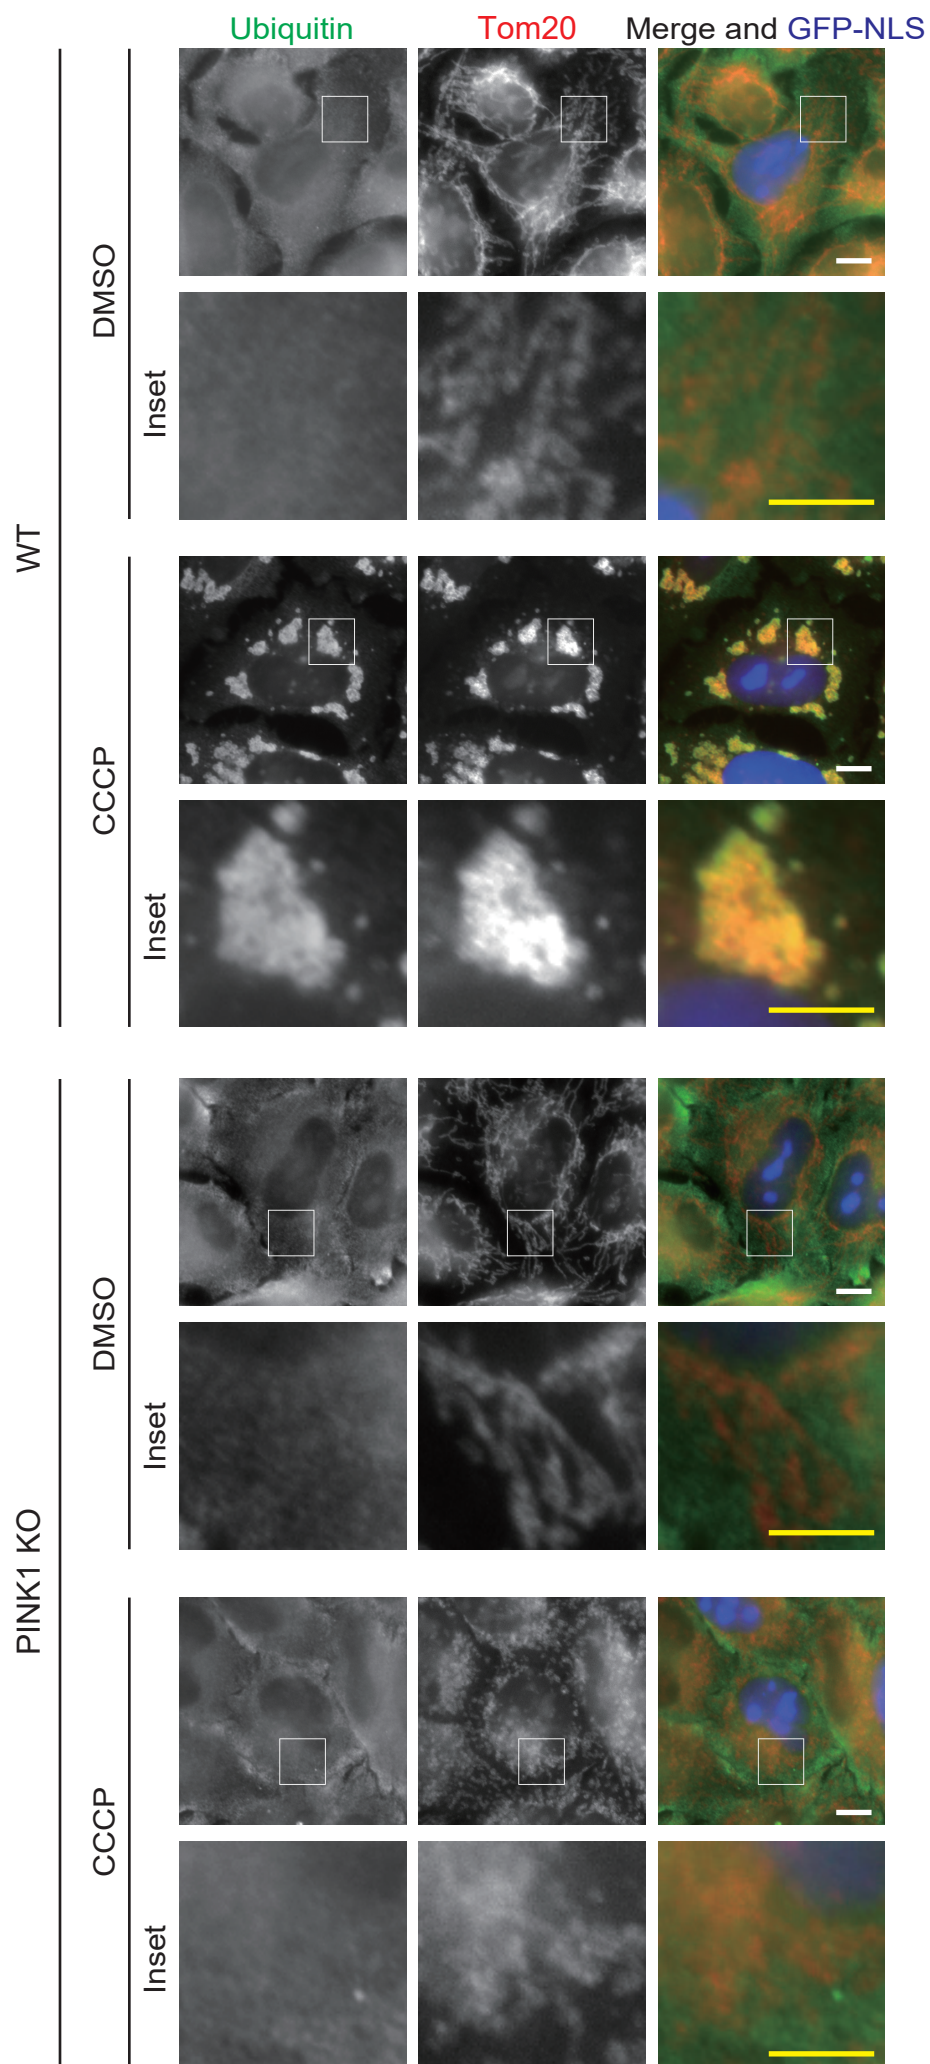

Figure S1 (continued)

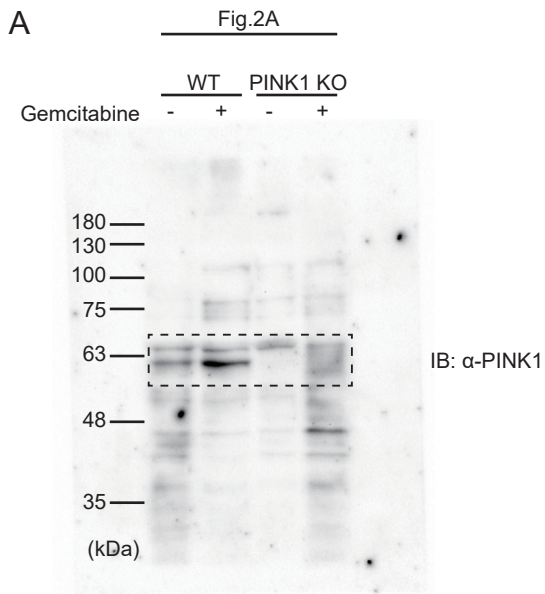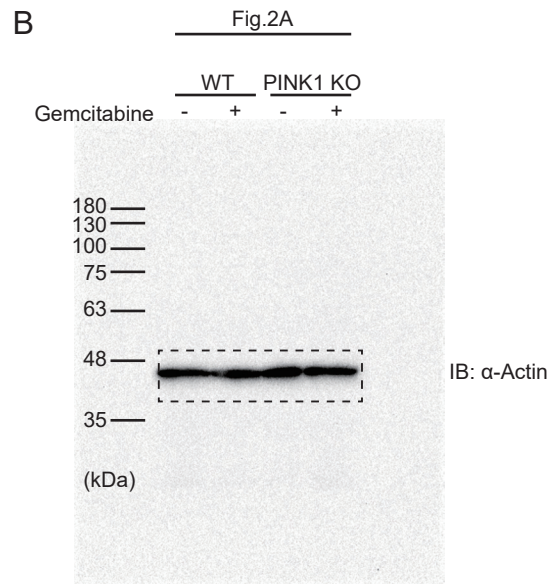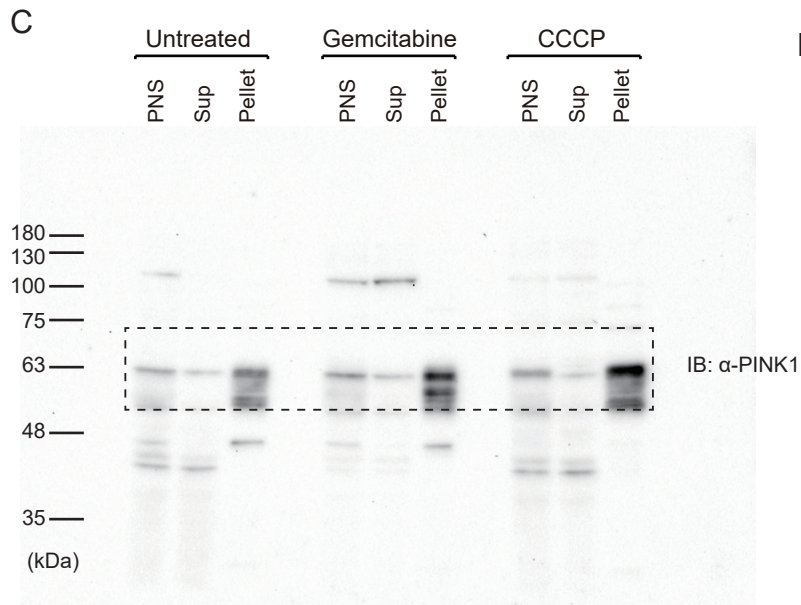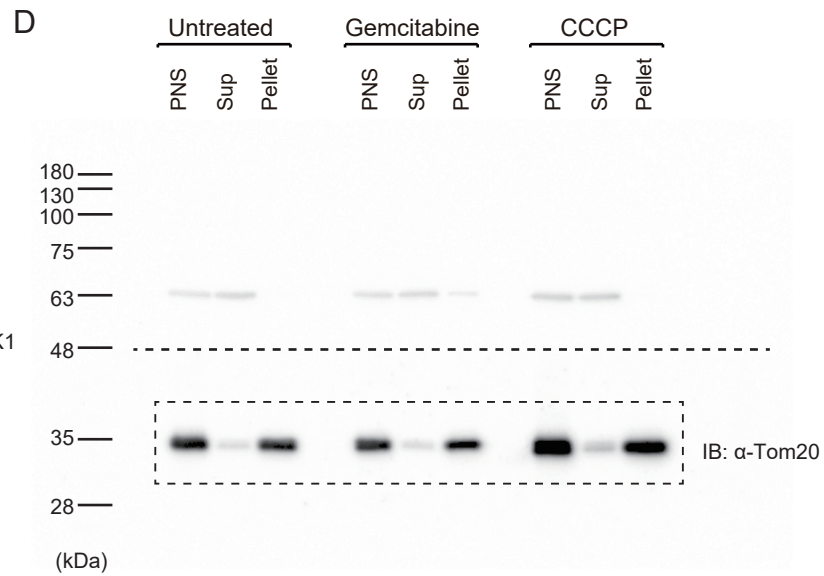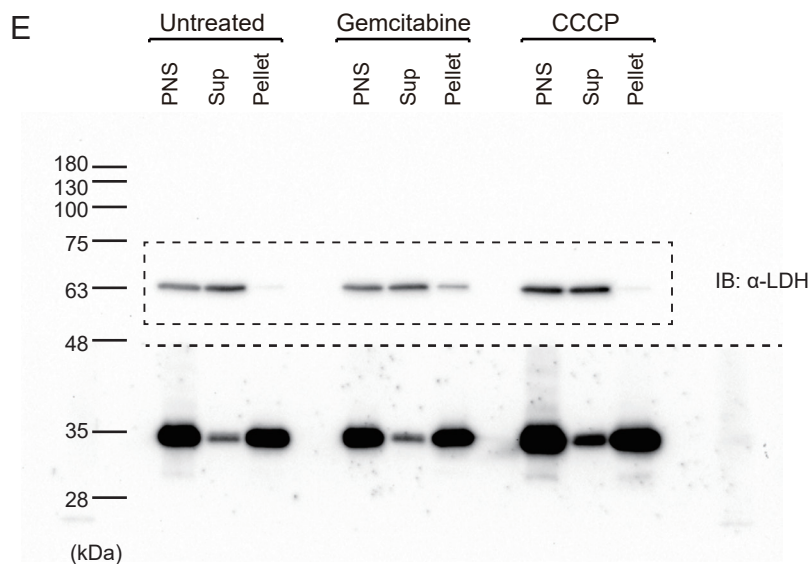

Figure S2

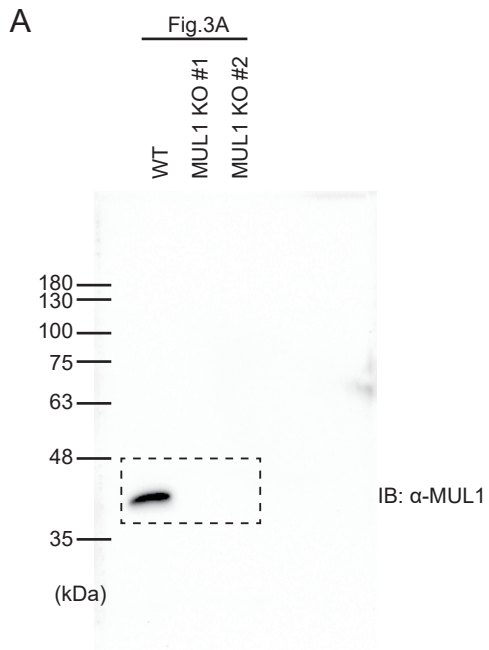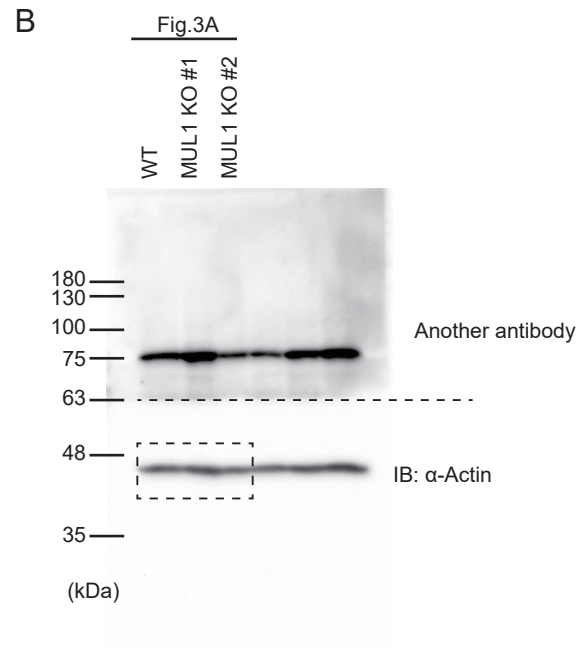

**A**

Fig. 4A left panels

| WT (Untreated) | Gemcitabine |          |         |            |
|----------------|-------------|----------|---------|------------|
|                | WT          | PINK1 KO | MUL1 KO | WT (CCCPC) |
|                |             |          |         |            |

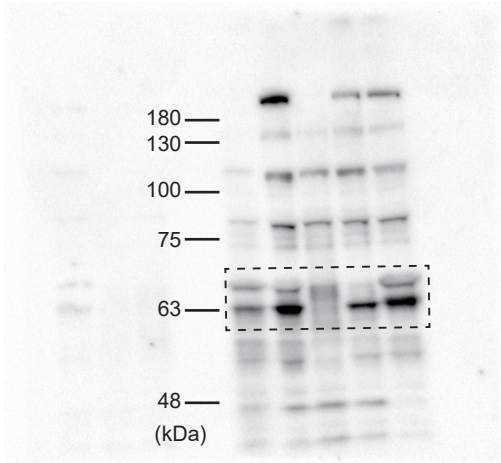**B**

Fig. 4A left panels

| WT (Untreated) | Gemcitabine |          |         |            |
|----------------|-------------|----------|---------|------------|
|                | WT          | PINK1 KO | MUL1 KO | WT (CCCPC) |
|                |             |          |         |            |

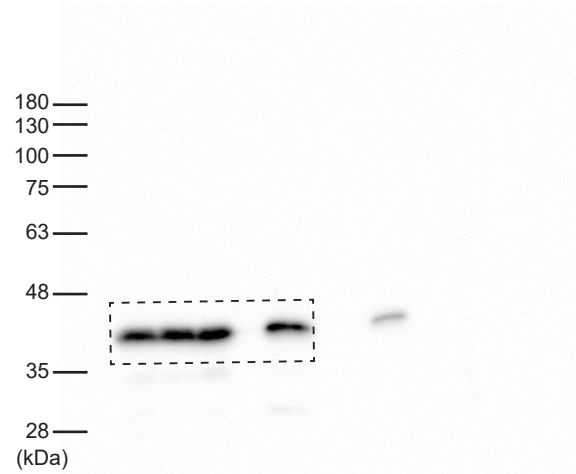**C**

Fig. 4A left panels

| WT (Untreated) | Gemcitabine |          |         |            |
|----------------|-------------|----------|---------|------------|
|                | WT          | PINK1 KO | MUL1 KO | WT (CCCPC) |
|                |             |          |         |            |

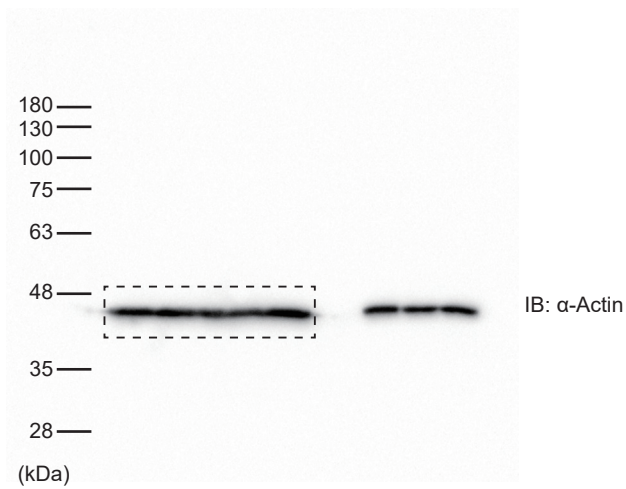**D**

Fig. 4A right panels

| Untreated |          |         |
|-----------|----------|---------|
| WT        | PINK1 KO | MUL1 KO |
|           |          |         |

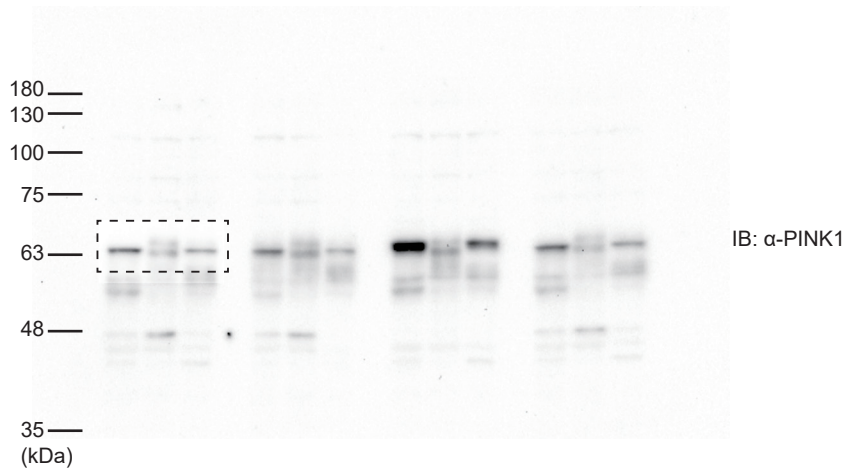**E**

Fig. 4A right panels

| Untreated |          |         |
|-----------|----------|---------|
| WT        | PINK1 KO | MUL1 KO |
|           |          |         |

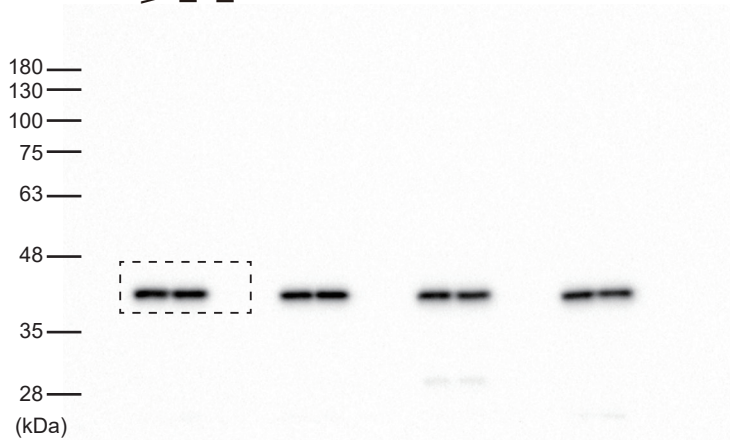**F**

Fig. 4A right panels

| Untreated |          |         |
|-----------|----------|---------|
| WT        | PINK1 KO | MUL1 KO |
|           |          |         |

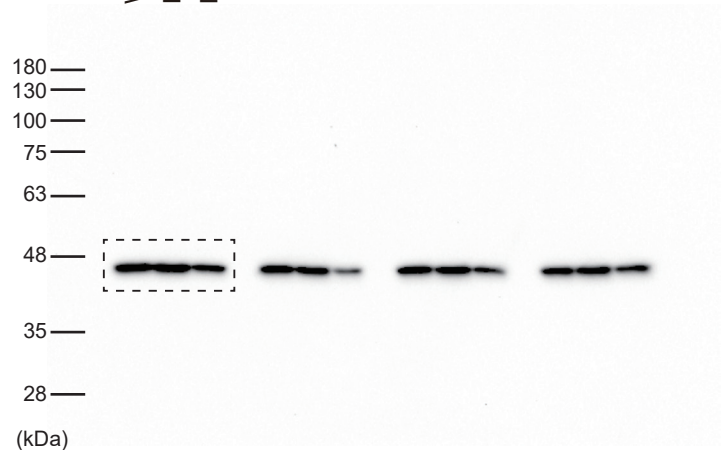

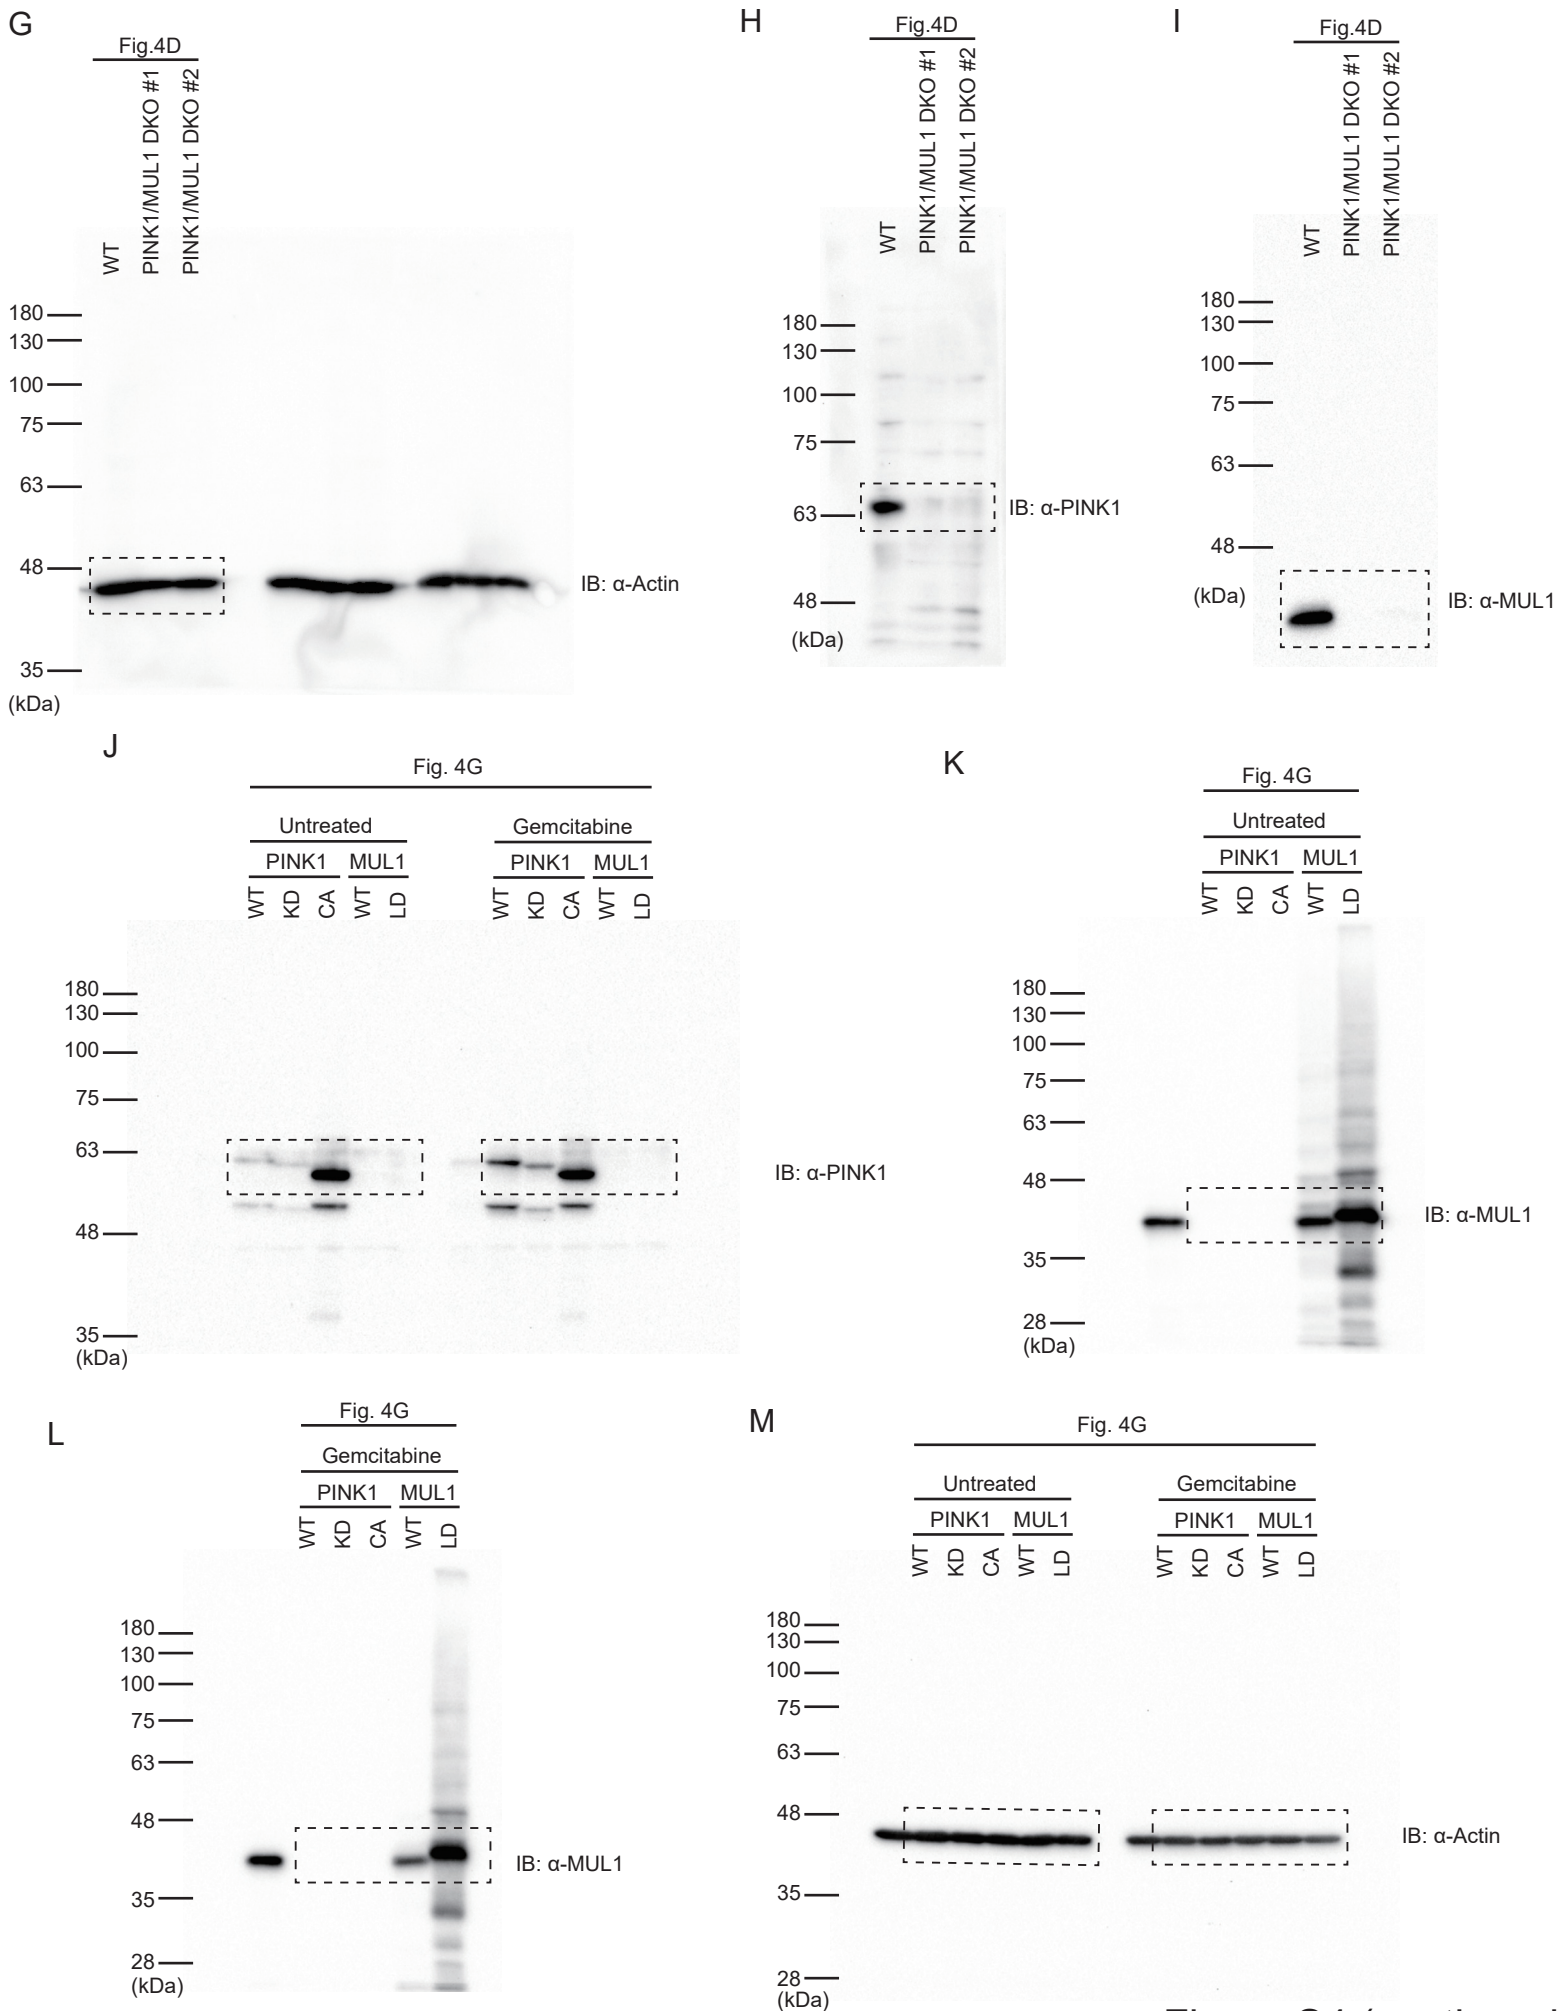

Figure S4 (continued)
